## Cheetah: a computational toolkit for cybergenetic control

Elisa Pedone<sup>1,2,#</sup>, Irene de Cesare<sup>1,#</sup>, Criseida Zamora<sup>1,3,#</sup>, David Haener<sup>1,#</sup>, Lorena Postiglione<sup>1</sup>, Barbara Shannon<sup>3,4</sup>, Nigel Savery<sup>3,4</sup>, Claire S. Grierson<sup>3,5</sup>, Mario di Bernardo<sup>1,3,6</sup>, Thomas E. Gorochoowski<sup>3,5,+,\*</sup>, Lucia Marucci<sup>1,2,3,+\*</sup>

<sup>1</sup> Department of Engineering Mathematics, University of Bristol, Woodland Road, Bristol, UK

<sup>2</sup> School of Cellular and Molecular Medicine, University of Bristol, University Walk, Bristol, UK

<sup>3</sup> BrisSynBio, Life Sciences Building, Tyndall Avenue, Bristol, UK

<sup>4</sup> School of Biochemistry, University of Bristol, University Walk, Bristol, UK

<sup>5</sup> School of Biological Sciences, University of Bristol, Tyndall Avenue, Bristol, UK

<sup>6</sup> Department of EE and ICT, University of Naples Federico II, Via Claudio 21, Naples, Italy

# These authors contributed equally to this work and should be considered co-first authors

+ These authors contributed equally to this work and should be considered co-senior authors

\* Correspondence should be addressed to T.E.G. ([thomas.gorochoowski@bristol.ac.uk](mailto:thomas.gorochoowski@bristol.ac.uk)) and L.M. ([lucia.marucci@bristol.ac.uk](mailto:lucia.marucci@bristol.ac.uk))

**Keywords:** image analysis; microscopy; feedback control; deep learning; convolutional neural network; U-Net; cybergenetics; synthetic biology; biological control

## 1 **Abstract**

2 Advances in microscopy, microfluidics and optogenetics enable single-cell monitoring and  
3 environmental regulation and offer the means to control cellular phenotypes. The development  
4 of such systems is challenging and often results in bespoke setups that hinder reproducibility. To  
5 address this, we introduce Cheetah – a flexible computational toolkit that simplifies the integration  
6 of real-time microscopy analysis with algorithms for cellular control. Central to the platform is an  
7 image segmentation system based on the versatile U-Net convolutional neural network. This is  
8 supplemented with functionality to robustly count, characterise and control cells over time. We  
9 demonstrate Cheetah’s core capabilities by analysing long-term bacterial and mammalian cell  
10 growth and by dynamically controlling protein expression in mammalian cells. In all cases,  
11 Cheetah’s segmentation accuracy exceeds that of a commonly used thresholding-based method,  
12 allowing for more accurate control signals to be generated. Availability of this easy-to-use  
13 platform will make control engineering techniques more accessible and offer new ways to probe  
14 and manipulate living cells.

## 15 Introduction

16 Modern automated microscopy techniques enable researchers to collect vast amounts of single-  
17 cell imaging data at high temporal resolutions. This has resulted in time-lapse microscopy  
18 becoming the go to method for studying cellular dynamics, enabling the quantification of  
19 processes such as stochastic fluctuations during gene expression <sup>1-3</sup>, emerging oscillatory  
20 patterns in protein concentrations <sup>4</sup>, lineage selection <sup>5,6</sup>, and many more <sup>7</sup>.

21 To make sense of microscopy images, segmentation is performed whereby an image is  
22 broken up into regions corresponding to specific features of interest (e.g. cells and the  
23 background). Image segmentation allows for the accurate quantification of cellular phenotypes  
24 encoded by visual cues (e.g. fluorescence) by ensuring only those pixels corresponding to a cell  
25 are considered. A range of segmentation algorithms have been proposed to automatically  
26 analyse images of various organisms and tissues <sup>3,8-11</sup>. The most common of these are  
27 thresholding <sup>12</sup> and seeded watershed <sup>13</sup> methods, which are available in many scientific image  
28 processing toolkits. Commercial software packages also implement this type of functionality,  
29 enabling both automated image acquisition and analysis (e.g. NIS-Elements, Nikon). While these  
30 proprietary systems are user-friendly requiring no programming skills to be used, they are often  
31 difficult to tailor for specific needs and cannot be easily extended to new forms of analysis.

32 More recently, deep learning-based approaches to image segmentation have emerged  
33 <sup>7,14-17</sup>. Compared to the more common thresholding-based approaches <sup>12</sup>, deep learning methods  
34 tend to require more significant computational resources when running on traditional computer  
35 architectures, and often require the time-consuming manual step of generating large numbers of  
36 classified images for training. However, once trained deep learning methods <sup>7</sup> are generally more  
37 robust to varying image quality and provide comparable <sup>18</sup> or superior segmentation accuracy <sup>17</sup>  
38 to thresholding-based methods.

39 The accuracy and robustness of a segmentation method are particularly important for  
40 online applications. For example, where an environment is dynamically controlled during an  
41 experiment in response to changes in cell state. Real-time image analysis and segmentation  
42 allows for the implementation of external feedback control <sup>19,20</sup>. Typically, in such an experiment  
43 a combined microfluidic and microscopy platform is used to allow for images of single cells to be  
44 continually captured and analysed, with changes immediately processed. The state of the cells  
45 is generally signalled by the expression of a fluorescence protein that can be dynamically  
46 monitored and used as input to a control algorithm. The comparison of this cellular signal to the  
47 desired reference *in silico* allows a control signal to be generated by computer software that can  
48 be used to alter the cellular environment and perturb the cellular state in the required way (closing  
49 the loop). Generally, these experiments require the cells to be genetically engineered to transmit  
50 their state using fluorescence and respond to specific environmental stimuli in a prescribed way.  
51 This combination of computational, physical, and genetic aspects has resulted in this type of

52 approach being termed external cybergenetic control and has been successfully applied for gene  
53 expression regulation in yeast <sup>21–24</sup>, bacteria <sup>25</sup> and mammalian cells <sup>26</sup>. Such external feedback  
54 control can also be implemented using optogenetics <sup>2,27</sup> and in combination with flow cytometry  
55 for online measurement of the control output <sup>28</sup>. When compared to embedded cellular controllers  
56 (where both the controlled process and the controller are implemented within the cell using  
57 synthetic regulatory networks), external controllers benefit from requiring only minimal cellular  
58 modification, placing little burden on a cell; also, a single control platform can be used for the  
59 automatic regulation of different cellular processes across cellular species (e.g. gene expression  
60 <sup>21,22</sup>, cell growth <sup>28</sup>, cytosol-nuclear protein translocation <sup>29</sup>).

61 In terms of software, while control algorithms such as proportional integral, model  
62 predictive control and zero average dynamics are versatile enough to be used in many contexts<sup>30</sup>,  
63 an online segmentation algorithm usually needs to be tailored given the cell type and the image  
64 acquisition settings. For example, if using a thresholding-based approach, various parameters in  
65 the segmentation code must be adjusted by trial-and-error before running a closed-loop control  
66 experiment. Furthermore, these settings must not significantly change during an experiment (e.g.  
67 due to a loss of focus), otherwise accuracy will be compromised. If the online measurements  
68 deviate from the real state of the cells, the overall control experiments will fail as inputs become  
69 calibrated to a miscalculated control error.

70 In this work, we aim to address these difficulties by developing a computational toolkit  
71 called Cheetah to help simplify external cybergenetic control applications. We demonstrate its  
72 core functionality and flexibility by both post-processing time-lapse data for bacterial and  
73 mammalian cell growth in a microfluidic chip and external feedback control of gene expression  
74 in mammalian cells. We demonstrate Cheetah's increased robustness compared to the widely  
75 used Otsu thresholding-based method <sup>12,31</sup> and show how poor segmentation can lead to  
76 miscomputed control error and the possible failure of an experiment. Cheetah has a broad range  
77 of potential applications from post-experiment image analysis to robust real-time feedback  
78 control. Access to these capabilities in an easy-to-use package will help simplifying the  
79 integration of control engineering techniques into cell imaging platforms and offer new ways of  
80 robustly regulating the behaviour of living cells.

81

## 82 **Results**

### 83 ***The Cheetah computational toolkit***

84 Cheetah is a Python package designed to support closed-loop control in cybergenetic  
85 applications (i.e. systems that combine computational and genetic elements). It combines real-  
86 time image segmentation using the U-Net convolutional neural network (CNN) <sup>15,32</sup> with image  
87 analysis and cellular control algorithms. U-Net was chosen for segmentation because it has been  
88 proven reliable for a wide range of applications in systems and synthetic biology <sup>15,33,34</sup>. Cheetah

89 implements U-Net using Keras and to avoid overfitting, regularization can be customised to use  
90 either batch normalisation or a dropout rate (all examples in this work use batch normalisation).

91 Cheetah is composed of four modules (**Figure 1**). The first module supports the  
92 generation of training data for the U-Net model. Creation of training data can be laborious,  
93 therefore a 'DataAugmentor' class is provided to allow for a few labelled training images to be  
94 resampled and manipulated, generating a large augmented set of training images. This works by  
95 sampling subregions of manually labelled images and then randomly applies image rotations,  
96 vertical and horizontal flips, scaling and shearing operations, and adjustments to the image  
97 histogram to simulate varying illumination levels. The use of these augmented training sets allows  
98 an accurate segmentation model to be trained using a far smaller number of manually labelled  
99 images <sup>15</sup>.

100 The second module is focused on the segmentation of images into various classes (e.g.,  
101 class 1 = background, class 2 = cell). This functionality is defined within the 'Segmenter' class,  
102 which also includes functions to train the built-in U-Net model, to save and load the parameters  
103 for previously trained models, and to use a model for predicting the class of each pixel in a new  
104 image or image stack.

105 The third module takes segmented images as an input and can apply a range of common  
106 analyses. These include the extraction of pixel intensity histograms for a particular segmentation  
107 class (e.g. the intensity of all pixels within cells), the ability to classify and label separate cells,  
108 and to track cells across a time-series of images (provided movement is limited between frames).

109 Finally, the fourth module allows for the implementation of user-defined feedback control  
110 algorithms. These are implemented by extending the 'ControlAlgorithm' class, which includes  
111 placeholder functions for initialising the control setup and an execution loop that continually  
112 processes images and generates a control output that will be used to actuate the experimental  
113 setup. Built-in functions for Relay, Proportional–Integral (PI) and Proportional–Integral–  
114 Derivative (PID) control are provided as examples.

115

### 116 ***Robust image segmentation and analysis of bacteria and mammalian cells***

117 To demonstrate the core functionality of Cheetah, we made use of an integrated microfluidics  
118 and imaging platform that we have previously used for external feedback control of engineered  
119 bacterial and mammalian cells <sup>29</sup> (**Methods**). Previous time-lapse videos were collated and  
120 analysed using Cheetah and comparisons made to the same analyses performed using the  
121 common Otsu thresholding-based segmentation method.

122 We began by post-processing an open-loop time-lapse experiment of *Escherichia coli*  
123 cells containing a genetic construct which uses an orthogonal  $\sigma$ /anti- $\sigma$  pair to regulate expression  
124 of a green fluorescent protein (*gfp*) gene <sup>35</sup> (**Methods**). The experiment consisted of cells being  
125 grown in a microfluidic device designed for long-term bacterial culture <sup>36</sup> (**Figure 2A**) and images

126 (including fluorescence) were acquired every 5 minutes over a 24-hour period (**Methods**). Before  
127 Cheetah could be used for analysis, it was necessary to train the system to be able to detect the  
128 bacteria in our experiment. This was done by manually annotating only 2 large images (512 ×  
129 512 pixels) containing 329 cells in total, with each pixel labelled as either ‘background’, ‘cell  
130 border’, or ‘cell interior’. These training images were augmented using Cheetah’s DataAugmentor  
131 class to create a final set of 60 smaller annotated images (256 × 256 pixels). Using this set of  
132 images allowed for a 99.5% segmentation accuracy to be reached after training (**Methods**). Once  
133 trained, Cheetah segmentation masks were generated and used to calculate the number of cells  
134 and average GFP fluorescence per cell (**Figures 2B, 2C**). These results were compared to  
135 similar analyses using segmentation masks generated using an Otsu-thresholding based  
136 approach that we<sup>29</sup> and others<sup>21,22</sup> have previously implemented in a similar experimental setup  
137 (**Supplementary Movie 1; Methods**).

138 There were several clear differences between the two segmentation methods. First,  
139 Cheetah gave more robust segmentation results, being able to accurately isolate the bacterial  
140 cells from their environment (**Figure 2B**). This differed from the Otsu segmentation method,  
141 which struggled due to the edges of the microfluidic chamber and noise within the empty chamber  
142 that generated high-contrast features. This resulted in the walls and empty regions of the  
143 chamber being classified as cells, and caused a large reduction in GFP fluorescence per cell for  
144 the Otsu method at the start of the experiment, when only a few cells were present (**Figure 2B**).  
145 As the experiment progressed, the impact of these misclassified regions was reduced as the  
146 majority of the image was covered in cells and so their impact was negligible. Furthermore, the  
147 Otsu method struggled to precisely distinguish individual cells, showing a visibly lower cell count  
148 once the chamber was filled with bacteria (**Figure 2C**). In contrast, Cheetah was not affected by  
149 any of these aspects and provided robust and reliable estimates of cell number and fluorescence  
150 per cell (**Figure 2C**) for the entire duration of the experiment. It should be noted that the significant  
151 difference of ~2600 arbitrary units (a.u.) in GFP fluorescence per cell at the beginning of the  
152 experiment between the methods would be a major problem for estimating a control signal,  
153 potentially causing large unwanted perturbations to the cells if used in an external feedback  
154 control system.

155 Bacterial cells generally have a simple and fairly consistent morphology across a  
156 population, which simplifies their classification. A more challenging problem is the analysis of  
157 mammalian cells whose shape can significantly vary over time. To assess Cheetah’s ability to  
158 handle these more complex cell types, we tested its ability to accurately isolate and characterise  
159 mouse embryonic stem cells (mESCs). Unlike in the bacterial example, mammalian cells can  
160 often die during an experiment, causing quantification of fluorescence to be influenced by these  
161 inactive cells. Ideally, dead cells should be excluded when calculating average fluorescence  
162 values, but often are not due to difficulties distinguishing each type with standard methods.

163 Fortunately, this capability can be easily enabled in Cheetah due to the underlying U-Net  
164 segmentation model allowing for additional label types. Therefore, to analyse mammalian cells  
165 using Cheetah, we manually annotated 34 large images (1280 × 1056 pixels) containing 314  
166 clones in total, with each pixel labelled as either ‘background’, ‘cell border’, ‘alive cell interior’, or  
167 ‘dead cell interior’ based on human knowledge regarding the generally smaller, disconnected  
168 and spherical shape of dead cells within a microfluidic chamber. Again, the DataAugmentor class  
169 was used to generate a final set of 536 smaller annotated images (512 × 512 pixels) which  
170 enabled Cheetah to reach a segmentation accuracy of 98% after training (**Methods**).

171 Next, we tested Cheetah using images from a 29-hour open-loop time-lapse experiment  
172 where engineered mESCs were grown in a microfluidic chamber that enabled long-term imaging  
173 (**Figure 2D**). mESCs were modified to carry an inducible genetic construct that expressed an  
174 mCherry fluorescent protein (**Methods**). As before, we compared the performance of cell  
175 segmentation and average mCherry fluorescence of Cheetah versus an Otsu segmentation  
176 approach (**Supplementary Movie 2**). Similar to the bacterial results, the Otsu method  
177 misclassified the walls of the microfluidic chamber as cells and struggled to precisely isolate cell  
178 bodies within the chamber (**Figure 2E**). The Otsu method was also not able to distinguish  
179 between alive and dead cells, resulting in measurements that combined both categories. When  
180 compared to the more accurate results generated by Cheetah, the Otsu method led to a slightly  
181 lower estimation of average mCherry fluorescence (**Figure 2F**). Cheetah was able to classify  
182 alive and dead cells and although not perfect, its ability to remove even some dead cells helped  
183 to improve its estimate of alive cell mCherry fluorescence, which was found to be marginally  
184 higher than for dead cells (**Figure 2F**).

185

### 186 ***External feedback control of protein expression in mammalian cells***

187 Having demonstrated the ability for Cheetah to robustly perform image analysis, we next  
188 attempted to validate its use for real-time external control of mammalian cells. Using the same  
189 engineered mESCs from the previous experiment, we employed an automated microscopy and  
190 fluidic control platform that allows for real-time live-cell imaging within microfluidic chips and the  
191 precise control of media and chemical inducers fed to the cells by the movement of motorised  
192 syringes (**Figure 3A**)<sup>26</sup>. To allow for cells to be controlled by this system, mESCs carried a dual-  
193 input genetic construct where an mCherry fluorescent protein fused to a destabilising-domain  
194 (DD) was under the control of a ‘Tet-On’ promoter (**Figure 3B, Methods**)<sup>26</sup>. This allowed the  
195 mCherry reporter to be switched ‘on’ by the combined presence of doxycycline (Doxy) and  
196 trimethoprim (TMP). By varying the concentration of these chemicals using the experimental  
197 platform in response to the deviation between the current mCherry fluorescence of the cells and  
198 the desired reference value, closed-loop real-time control of the cells could be achieved.

199 To test the effectiveness of Cheetah for external *in silico* feedback control, mESCs  
200 carrying the dual-input genetic construct were exposed overnight to high concentrations of Doxy  
201 (1  $\mu\text{g}/\text{mL}$ ) and TMP (100 mM) to cause strong mCherry expression. These cells were then  
202 seeded into a microfluidic chip placed on our control platform (**Figure 3A**) and a Relay control  
203 algorithm<sup>26</sup> was used to allow for set-point regulation of mCherry expression over a period of 24  
204 hours (**Methods**). In this case, we selected a desired reference average mCherry fluorescence  
205 of 10 arbitrary units (a.u.), which was half of the saturating mCherry fluorescence reached  
206 overnight. For closed-loop feedback control, images were streamed to Cheetah every 60  
207 minutes; each image was immediately segmented, and the mask generated for alive cells was  
208 used to estimate average mCherry fluorescence. This data was then fed to an external system  
209 to actuate the necessary control action (i.e. movement of the syringes and thus change in Dox  
210 and TMP concentration experienced by the cells) on the experimental platform.

211 Results from this experiment showed the ability for the platform to accurately control  
212 average mCherry fluorescence from the cells throughout the experiment (**Figures 3C, 3D;**  
213 **Supplementary Movie 3**). We manually annotated 4 frames of the time-lapse data at 0, 8, 16,  
214 and 24 hours and compared the average mCherry fluorescence calculated using these masks  
215 and those automatically generated by Cheetah. Close agreement was found for the alive and  
216 dead cells for most time points, with the only major deviation being for dead cells at 0 hours.  
217 Dead cells are often difficult to distinguish from living cells, so some differences, especially during  
218 seeding where cells are becoming accustomed to their new environment, would be expected  
219 (**Figure 3E**).

220 For comparison, we ran the identical time-lapse imaging data offline through the Otsu  
221 segmentation method used in the previous section (**Figure 3D; Supplementary Movie 3**).  
222 Estimates of average mCherry fluorescence saw much lower levels due to misclassification of  
223 the chamber walls. Such incorrect estimation of fluorescence would have resulted in the mistaken  
224 triggering of the control input throughout the experiment.

225

## 226 Discussion

227 As our ability to create cybergenetic systems that combine computational, physical, and  
228 biological elements advances, the need for supporting software to coordinate and control these  
229 systems will grow. Cheetah is an attempt to simplify this process by providing an easy-to-use  
230 computational toolkit that while containing core functionality to speed up most projects, is also  
231 highly adaptable to new needs. Here, we have demonstrated Cheetah's abilities to rapidly  
232 classify and segment two morphologically different cell types in two different microfluidic settings.  
233 We show that Cheetah can rapidly compute highly accurate image segmentation (99.5% and  
234 98% for *E. coli* and mESCs, respectively) even when trained using only a small number of  
235 manually annotated images (2 and 34 images for *E. coli* and mESCs, respectively). Furthermore,



236 we demonstrate how these capabilities allow for accurate control signals to be generated for  
237 external feedback control applications. In particular, the ability for Cheetah to not only segment,  
238 but also classify cells as potentially ‘dead’ or ‘alive’ enables it to filter out non-viable cells and  
239 leads to improved accuracy, as compared to a commonly used Otsu thresholding-based method.  
240 In addition to segmentation and control algorithms, Cheetah also includes a wide range of built  
241 in analysis for labelling cells, tracking their position across frames and using this information to  
242 enable analysis of single-cell properties like fluorescence (see **Supplementary Movie 4** for an  
243 example). Being able to automate the creation of analysis dashboards using these capabilities,  
244 will also help speed up the discovery of subtle behaviours in populations of cells and offer the  
245 means to reanalyse existing time lapse microscopy data in more depth.

246 While the focus here has been on demonstrating the major functionality of Cheetah, we  
247 anticipate that to can be applied much more broadly for applications across the field of synthetic  
248 biology. For example, using it within custom-built platforms able to perform imaging and dynamic  
249 light patterning<sup>27,28</sup> to control single-cell and guide collective behaviours<sup>37</sup>. Furthermore, the  
250 code provided in the toolkit can easily be refined, customised and extended to allow for new  
251 features to be implemented. As such, Cheetah is a public, open-source project hosted on GitHub  
252 and welcomes contributions from the wider community.

253 Finally, we expect the deep learning methods that are central to Cheetah’s capabilities to  
254 play an increasingly important role in synthetic biology. In the context of external feedback  
255 control, the combination of deep learning-based label-free cell classification<sup>38,39</sup>, online training  
256 approaches, model-free control strategies (e.g. reinforcement learning-based feedback control),  
257 and the availability of tunable genetic parts<sup>26,35,40,41</sup> could be instrumental in unlocking the  
258 potential for control engineering techniques in biology. This will open up new avenues to create  
259 reliable and robust synthetic biological systems, much like how control engineering has  
260 revolutionised other fields.

261

## 262 **Methods**

### 263 ***Cheetah training process***

264 Training of the U-Net convolutional neural network within Cheetah was performed using a Dell  
265 Precision 5530 laptop (Intel Core i7-8850H CPU, 16 GB RAM, and 512 GB NVMe SSD) running  
266 Windows 10, connected to a Sonnet eGFX Breakaway Box 550 hosting an NVIDIA Titan Xp GPU  
267 with 12 GB GDDR5X RAM. For all organisms, the full set of annotated images were randomly  
268 split with 70% used for training and the remaining 30% used for validation.

269

### 270 ***Otsu thresholding-based segmentation algorithm***

271 The Otsu segmentation method is based on pixel intensity levels and relies on the definition of  
272 grey threshold values used to divide a grayscale image into its components creating a binary

273 mask<sup>12</sup>. The simplest version of this algorithm allows for the identification of two-pixel classes,  
274 background and foreground, by using a single threshold level that aims to minimise the intra-  
275 class variance. More sophisticated versions of the algorithm couple global thresholding,  
276 previously described, to local thresholding, which computes dividing grey-intensity levels on  
277 smaller patches of the same image in order to boost the algorithm accuracy. In this work,  
278 segmentation of bacteria was computed using the Otsu method with global and local  
279 thresholding. The algorithm distinguished the foreground (single bacterial cells) from the  
280 background in each image of the time-lapse experiment. The global thresholding calculated the  
281 global area where cells are located, and the local thresholding found the centres and edges to  
282 differentiate individual cells in a binary mask. The final mask contained the boundaries and  
283 interiors of every segmented cell. This mask was overlaid to the fluorescence image field to  
284 calculate the fluorescence as the sum of all pixels in the segmented area minus the background  
285 fluorescence value. The average fluorescence across the bacterial population was then  
286 calculated as the mean of the fluorescence exhibited by all the objects in the final mask.  
287 Mammalian cells fluorescence was computed as the average pixel intensity value of pre-masked  
288 fluorescent images to which an average background intensity was subtracted, to take into  
289 account possible oscillations of microscopy's light intensity. Masked images were obtained using  
290 the global thresholding strategy. For further details and access to the code, we refer the reader  
291 to de Cesare et al.<sup>31</sup>

292

### 293 ***Bacterial strains, media and cell culture***

294 Experiments with bacteria used a previously generated *E. coli* strain<sup>35</sup>. Luria–Bertani (LB)  
295 medium (113002065, MP Biomedicals) supplemented with 50 µg/mL kanamycin (K4000, Sigma-  
296 Aldrich), 100 µg/mL ampicillin (A9518, Sigma-Aldrich) and 25 µg/mL chloramphenicol (C0378,  
297 Sigma-Aldrich) was used for all bacterial cell culture and microfluidics experiments. For  
298 microfluidic experiments, a single colony was used to seed 5 mL of LB media with antibiotics and  
299 grown overnight (approximately 16 hours) at 37°C with shaking at 200 rpm. 300 µL of the  
300 overnight culture was used to seed 300 mL of fresh LB medium with antibiotics. This culture was  
301 grown to an optical density at 600 nm of 0.3. The culture was then centrifuged at 2200 × *g* for 15  
302 min and resuspended in 1.5 mL of fresh LB medium supplemented with 0.075% Tween-20  
303 (P1379, Sigma-Aldrich) and antibiotics before loading into the microfluidic device.

304

### 305 ***Mammalian cell lines, media and culture***

306 Experiments with mammalian cells used a previously generated mouse Embryonic Stem Cell  
307 (mESC) line<sup>26</sup>. Briefly, mESCs were subjected to two rounds of infection and drug-selection to  
308 stably express the transactivator (EF1a-rTA, Neomycin) and the doxycycline-inducible vector  
309 (pLVX\_TRE3GDDmCherry, Puromycin; Addgene plasmid #108679). Selected cells were

310 expanded and grown on gelatin-coated dishes in knockout Dulbecco's modified Eagle's medium  
311 (DMEM D5796, Sigma) supplemented with 15% fetal bovine serum (F7524, Sigma), 1 x  
312 nonessential amino acids (11140035, Thermo Fisher), 2 mM L-Glutamine (25030024, Thermo  
313 Fisher), 100  $\mu$ M 2-mercaptoethanol (31350010, Thermo Fisher), 1 mM Sodium Pyruvate  
314 (11360039, Thermo Fisher), 1 X Penicillin/Streptomycin (P4458, Sigma) and 1000 U/mL LIF  
315 (250-02, Peprotech).

316

### 317 **Microfluidic devices and loading**

318 For *E. coli*, the microfluidic device used was developed by Mondragón-Palomino and colleagues  
319 at the University of California, San Diego <sup>36</sup>. A replica of the silicon mould was donated to our  
320 group. Soft lithography was used to form the microfluidic device which contains 48 trapping  
321 chambers and 6 inlet/outlet ports. Before each experiment, a wetting protocol was used to  
322 remove any air bubbles and debris from inside the device. The device was then mounted onto  
323 the stage of an inverted widefield fluorescence microscope, enclosed inside an incubation  
324 chamber set to 37°C (Pecon) and connected to fluidic lines. A cell loading protocol, trapping  
325 individual cells in the chambers of the device was performed via the C port. Ports W1 and W2  
326 were used as waste ports, the C port became a waste port once the experiment had begun. Ports  
327 B and I were connected to an actuation system for motorised control of syringes to deliver fresh  
328 media and inputs to the cells growing inside the device. The R port was used as a mixing port.  
329 The microscope (see below for details) was programmed to take phase contrast (PhC), green  
330 fluorescence and red fluorescence images of the cells growing inside three different trapping  
331 chambers every 5 minutes. Green fluorescence images were used for the detection of sfGFP  
332 and red fluorescence images were used for the detection of the sulforhodamine B dye (230162,  
333 Sigma-Aldrich), used to detect the correct flow of inputs.

334 For mESCs, microfluidic chip loading and imaging were performed as reported previously  
335 <sup>26</sup>. The microfluidic device we used was designed in the laboratory of Prof Jeff Hasty at the  
336 University California in San Diego. It consists of 5 ports for cell lading and media input/output, 33  
337 individual chambers for cell growth and imaging, and a channel for controlled flow perfusion <sup>42</sup>.  
338 The chip was fulfilled with complete mESC media supplemented with 1  $\mu$ g/mL Doxy (D9891,  
339 Sigma) and 100 nM TMP (T7883, Sigma) flowing from port 5 followed by port 1 before the cell  
340 loading. Cells from a sub-confluent petri dish (60 cm in diameter) were washed with sterile  
341 Phosphate Buffered Saline (PBS D8537, Sigma), trypsinised for 2-3 min at room temperature  
342 and centrifuged at 1000 rpm for 5 min. Pelleted cells were resuspended in 200  $\mu$ L of complete  
343 mESC medium+Doxy/TMP and gently loaded from port 1 using a 2 mL syringe, while applying  
344 constant vacuum suction to ports 3 and 4. The vacuum enables cell trapping by facilitating air  
345 release from the chambers. The chip was kept for 24 hours in a tissue culture incubator (5% CO<sub>2</sub>,  
346 37°C) under constant Doxy/TMP perfusion to induce mCherry expression before the time-lapse.

347 The day after, the device was transferred on the widefield microscope and connected to the  
348 actuation system that consists of two motor-controlled syringes  
349 (<http://biodynamics.ucsd.edu/dialawave/>) connected to port 6 and 7. One syringe contains Doxy,  
350 TMP and 1  $\mu\text{M}$  of Atto488 green fluorescent dye (41051-1MG-F, ThermoFisher), whereas the  
351 other only contains plain mESC media. Ports 1, 2 and 5 were connected to stating syringes to  
352 balance the flow of media from ports 6 and 7, ensuring constant perfusion and avoiding backflow.  
353 During the open-loop experiment (**Figures 2E, 2F**) mESCs were exposed to plain media for the  
354 entire duration of the time-lapse, whereas dynamic switching between plain and Doxy/TMP  
355 media was automatically controlled during the closed-loop experiment (**Figures 3C, 3D**) to reach  
356 and maintain a desired reference red fluorescence level.

357

### 358 **Live-cell imaging**

359 Time-lapse microscopy for both *E. coli* and mESCs were performed using a Leica DMi8 inverted  
360 microscope equipped with an environmental control chamber (PeCon) for long-term temperature  
361 control and CO<sub>2</sub> enrichment where necessary. The Adaptive Focus Control (AFC) ensures focus  
362 is maintained during the entire time-course experiment. Imaging of *E. coli* cells was performed  
363 using a 100X objective every 5 min using an AndoriXON 897 ultra back-illuminated EMCCD (512  
364 × 512 pixel 16  $\mu\text{m}$  pixels, 16-bit, 56 fps at full frame) in a temperature-controlled environment.  
365 Imaging of mESCs was performed using a 20X objective every 60 minutes in a temperature and  
366 CO<sub>2</sub> controlled environment. The experimental set-up includes consecutive acquisition in three  
367 channels (phase contrast, green fluorescence and red fluorescence).

368

### 369 **Relay control algorithm**

370 The Relay Control algorithm provides at each timepoint a control action that aims to minimise the  
371 error signal ( $e$ , defined as the difference between a reference signal and the process output).  
372 Formally, the controller generates the following control input

$$373 \quad u(t) = \begin{cases} u_1 & \text{if } e(t) > 0 \\ u_2 & \text{if } e(t) \leq 0 \end{cases} \quad (1)$$

374 to decrease the error. In our experiments, the control input  $u_1$  corresponds to providing cells  
375 culture media supplemented with Doxy/TMP, while  $u_2$  corresponds to providing cells with plain  
376 media. The algorithm also implements a 5% hysteresis interval around the set-point to avoid  
377 chattering in the control signal.

378

### 379 **General computational analysis and tools**

380 Computational analysis was performed by custom scripts run using Python 3.6.8 and the  
381 following packages: tensorflow 1.14.0, keras 2.2.4, scikit-learn 0.21.2, scikit-image 0.15.0,  
382 numpy 1.16.4 and matplotlib 3.1.1. Genetic designs are visualised using DNAplotlib 1.0<sup>43,44</sup> and

383 Synthetic Biology Open Language Visual (SBOL Visual) symbols <sup>45</sup>. Figures were composed  
384 using Omnigraffle 7.16 and Affinity Designer 1.8.3.

385

### 386 ***Data availability***

387 The Cheetah Python package, analysis code and data presented in this work are available from  
388 the project GitHub repository at: <https://www.github.com/BiocomputeLab/cheetah>.

389

### 390 **Acknowledgements**

391 T.E.G. gratefully acknowledge the support of NVIDIA Corporation for the donation of a Titan Xp  
392 GPU used in this research. This work was supported by BrisSynBio, a BBSRC/EPSRC Synthetic  
393 Biology Research Centre grant BB/L01386X/1 (T.E.G., L.M.), a Royal Society University  
394 Research Fellowship grant UF160357 (T.E.G.), the EU Horizon 2020 research project COSY-  
395 BIO grant 766840 (L.M.), EPSRC grants EP/R041695/1 and EP/S01876X/1 (L.M.), and MRC  
396 grant MR/N021444/1 (L.M.)

397

### 398 **Author contributions**

399 L.M. and T.E.G. conceived of the project and supervised the work. D.H. developed the initial  
400 Keras implementation of the U-Net convolutional neural network. T.E.G. extended the U-Net  
401 implementation and developed the integrated Python package and cell analysis functions. E.P.,  
402 C.Z., W.W. and L.P. performed experiments and generated training data. L.M. and T.E.G. wrote  
403 the paper with input from the other authors.

404

### 405 **Conflicts of interest**

406 The authors declare no competing financial interests.

## 407 **References**

- 408 1. Marucci, L. *et al.*  $\beta$ -Catenin Fluctuates in Mouse ESCs and Is Essential for Nanog-Mediated  
409 Reprogramming of Somatic Cells to Pluripotency. *Cell Rep.* **8**, 1686–1696 (2014).
- 410 2. Rullan, M., Benzinger, D., Schmidt, G. W., Miliadis-Argeitis, A. & Khammash, M. An  
411 Optogenetic Platform for Real-Time, Single-Cell Interrogation of Stochastic Transcriptional  
412 Regulation. *Mol. Cell* **70**, 745-756.e6 (2018).
- 413 3. Young, J. W. *et al.* Measuring single-cell gene expression dynamics in bacteria using  
414 fluorescence time-lapse microscopy. *Nat. Protoc.* **7**, 80–88 (2012).
- 415 4. Gritti, N., Kienle, S., Filina, O. & van Zon, J. S. Long-term time-lapse microscopy of *C.*  
416 *elegans* post-embryonic development. *Nat. Commun.* **7**, 12500 (2016).
- 417 5. Piltti, K. M. *et al.* Live-cell time-lapse imaging and single-cell tracking of in vitro cultured  
418 neural stem cells – Tools for analyzing dynamics of cell cycle, migration, and lineage  
419 selection. *Neural Stem Cells Health Dis.* **133**, 81–90 (2018).
- 420 6. Brockway, N. L. *et al.* Multicolor lineage tracing using in vivo time-lapse imaging reveals  
421 coordinated death of clonally related cells in the developing vertebrate brain. *Dev. Biol.* **453**,  
422 130–140 (2019).
- 423 7. Bougen-Zhukov, N., Loh, S. Y., Lee, H. K. & Loo, L.-H. Large-scale image-based screening  
424 and profiling of cellular phenotypes. *Cytometry A* **91**, 115–125 (2017).
- 425 8. E. Meijering. Cell Segmentation: 50 Years Down the Road. *IEEE Signal Process. Mag.* **29**,  
426 140–145 (2012).
- 427 9. Stylianidou, S., Brennan, C., Nissen, S. B., Kuwada, N. J. & Wiggins, P. A. SuperSegger:  
428 robust image segmentation, analysis and lineage tracking of bacterial cells. *Mol. Microbiol.*  
429 **102**, 690–700 (2016).
- 430 10. Kametsky, L. *et al.* Improved structure, function and compatibility for CellProfiler: modular  
431 high-throughput image analysis software. *Bioinformatics* **27**, 1179–1180 (2011).
- 432 11. Eliceiri, K. W. *et al.* Biological imaging software tools. *Nat. Methods* **9**, 697–710 (2012).
- 433 12. Otsu, N. A Threshold Selection Method from Gray-Level Histograms. *IEEE Trans. Syst. Man*  
434 *Cybern.* **9**, 62–66 (1979).

- 435 13. Beucher, S. & Lantuejoul, C. Use of Watersheds in Contour Detection. in *International*  
436 *Workshop on Image Processing: Real-Time Edge and Motion Detection/Estimation* (1979).
- 437 14. C. Sommer, C. Straehle, U. Köthe & F. A. Hamprecht. Ilastik: Interactive learning and  
438 segmentation toolkit. in *2011 IEEE International Symposium on Biomedical Imaging: From*  
439 *Nano to Macro* 230–233 (2011). doi:10.1109/ISBI.2011.5872394.
- 440 15. Falk, T. *et al.* U-Net: deep learning for cell counting, detection, and morphometry. *Nat.*  
441 *Methods* **16**, 67–70 (2019).
- 442 16. Hilsenbeck, O. *et al.* fastER: a user-friendly tool for ultrafast and robust cell segmentation in  
443 large-scale microscopy. *Bioinformatics* **33**, 2020–2028 (2017).
- 444 17. Caicedo, J. C. *et al.* Evaluation of Deep Learning Strategies for Nucleus Segmentation in  
445 Fluorescence Images. *Cytometry A* **95**, 952–965 (2019).
- 446 18. Van Valen, D. A. *et al.* Deep Learning Automates the Quantitative Analysis of Individual Cells  
447 in Live-Cell Imaging Experiments. *PLOS Comput. Biol.* **12**, e1005177 (2016).
- 448 19. M. Khammash, M. Di Bernardo & D. Di Bernardo. Cybergenetics: Theory and Methods for  
449 Genetic Control System. in *2019 IEEE 58th Conference on Decision and Control (CDC)*  
450 916–926 (2019). doi:10.1109/CDC40024.2019.9030209.
- 451 20. Del Vecchio, D., Dy, A. J. & Qian, Y. Control theory meets synthetic biology. *J. R. Soc.*  
452 *Interface* **13**, 20160380 (2016).
- 453 21. Menolascina, F. *et al.* In-Vivo Real-Time Control of Protein Expression from Endogenous  
454 and Synthetic Gene Networks. *PLOS Comput. Biol.* **10**, e1003625 (2014).
- 455 22. F. Menolascina, M. di Bernardo & D. di Bernardo. Design and implementation of a feedback  
456 control strategy for IRMA, a novel synthetic gene regulatory network. in *49th IEEE*  
457 *Conference on Decision and Control (CDC)* 2535–2540 (2010).
- 458 23. Uhlendorf, J. *et al.* Long-term model predictive control of gene expression at the population  
459 and single-cell levels. *Proc. Natl. Acad. Sci.* **109**, 14271 (2012).
- 460 24. Perrino, G., Wilson, C., Santorelli, M. & di Bernardo, D. Quantitative Characterization of  $\alpha$ -  
461 Synuclein Aggregation in Living Cells through Automated Microfluidics Feedback Control.  
462 *Cell Rep.* **27**, 916-927.e5 (2019).

- 463 25. Lugagne, J.-B. *et al.* Balancing a genetic toggle switch by real-time feedback control and  
464 periodic forcing. *Nat. Commun.* **8**, 1671 (2017).
- 465 26. Pedone, E. *et al.* A tunable dual-input system for on-demand dynamic gene expression  
466 regulation. *Nat. Commun.* **10**, 4481 (2019).
- 467 27. A. M. R. Denniss, T. E. Goroehowski & S. Hauert. Augmented reality for the engineering of  
468 collective behaviours in microsystems. in *2019 International Conference on Manipulation,  
469 Automation and Robotics at Small Scales (MARSS) 1–6* (2019).  
470 doi:10.1109/MARSS.2019.8860907.
- 471 28. Miliadis-Argeitis, A., Rullan, M., Aoki, S. K., Buchmann, P. & Khammash, M. Automated  
472 optogenetic feedback control for precise and robust regulation of gene expression and cell  
473 growth. *Nat. Commun.* **7**, 12546 (2016).
- 474 29. Postiglione, L. *et al.* Regulation of Gene Expression and Signaling Pathway Activity in  
475 Mammalian Cells by Automated Microfluidics Feedback Control. *ACS Synth. Biol.* **7**, 2558–  
476 2565 (2018).
- 477 30. Fiore, G., Perrino, G., di Bernardo, M. & di Bernardo, D. In Vivo Real-Time Control of Gene  
478 Expression: A Comparative Analysis of Feedback Control Strategies in Yeast. *ACS Synth.  
479 Biol.* **5**, 154–162 (2016).
- 480 31. de Cesare, I. *et al.* ChipSeg: an automatic tool to segment bacteria and mammalian cells  
481 cultured in microfluidic devices. *bioRxiv* 2020.08.03.225045 (2020)  
482 doi:10.1101/2020.08.03.225045.
- 483 32. Ronneberger, O., Fischer, P. & Brox, T. U-Net: Convolutional Networks for Biomedical Image  
484 Segmentation. in *Medical Image Computing and Computer-Assisted Intervention – MICCAI  
485 2015* (eds. Navab, N., Hornegger, J., Wells, W. M. & Frangi, A. F.) 234–241 (Springer  
486 International Publishing, 2015).
- 487 33. Lugagne, J.-B., Lin, H. & Dunlop, M. J. DeLTA: Automated cell segmentation, tracking, and  
488 lineage reconstruction using deep learning. *PLOS Comput. Biol.* **16**, e1007673 (2020).
- 489 34. Weigert, M. *et al.* Content-aware image restoration: pushing the limits of fluorescence  
490 microscopy. *Nat. Methods* **15**, 1090–1097 (2018).



- 491 35. Annunziata, F. *et al.* An Orthogonal Multi-input Integration System to Control Gene  
492 Expression in Escherichia coli. *ACS Synth. Biol.* **6**, 1816–1824 (2017).
- 493 36. Mondragón-Palomino, O., Danino, T., Selimkhanov, J., Tsimring, L. & Hasty, J. Entrainment  
494 of a Population of Synthetic Genetic Oscillators. *Science* **333**, 1315 (2011).
- 495 37. Gorochofski, T. E. *et al.* Toward engineering biosystems with emergent collective functions.  
496 *Front. Bioeng. Biotechnol.* **8**, 705 (2020).
- 497 38. Chen, C. L. *et al.* Deep Learning in Label-free Cell Classification. *Sci. Rep.* **6**, 21471 (2016).
- 498 39. Matek, C., Schwarz, S., Spiekermann, K. & Marr, C. Human-level recognition of blast cells  
499 in acute myeloid leukaemia with convolutional neural networks. *Nat. Mach. Intell.* **1**, 538–  
500 544 (2019).
- 501 40. Bartoli, V., Meaker, G. A., di Bernardo, M. & Gorochofski, T. E. Tunable genetic devices  
502 through simultaneous control of transcription and translation. *Nat. Commun.* **11**, 2095  
503 (2020).
- 504 41. Baumschlager, A., Aoki, S. K. & Khammash, M. Dynamic Blue Light-Inducible T7 RNA  
505 Polymerases (Opto-T7RNAPs) for Precise Spatiotemporal Gene Expression Control. *ACS*  
506 *Synth. Biol.* **6**, 2157–2167 (2017).
- 507 42. Kolnik, M., Tsimring, L. S. & Hasty, J. Vacuum-assisted cell loading enables shear-free  
508 mammalian microfluidic culture. *Lab. Chip* **12**, 4732–4737 (2012).
- 509 43. Der, B. S. *et al.* DNAplotlib: Programmable Visualization of Genetic Designs and Associated  
510 Data. *ACS Synth. Biol.* **6**, 1115–1119 (2017).
- 511 44. Bartoli, V., Dixon, D. O. R. & Gorochofski, T. E. Automated Visualization of Genetic Designs  
512 Using DNAplotlib. in *Synthetic Biology: Methods and Protocols* (ed. Braman, J. C.) 399–409  
513 (Springer New York, 2018). doi:10.1007/978-1-4939-7795-6\_22.
- 514 45. Beal, J. *et al.* Communicating Structure and Function in Synthetic Biology Diagrams. *ACS*  
515 *Synth. Biol.* **8**, 1818–1825 (2019).

516

517 **Figures and captions**

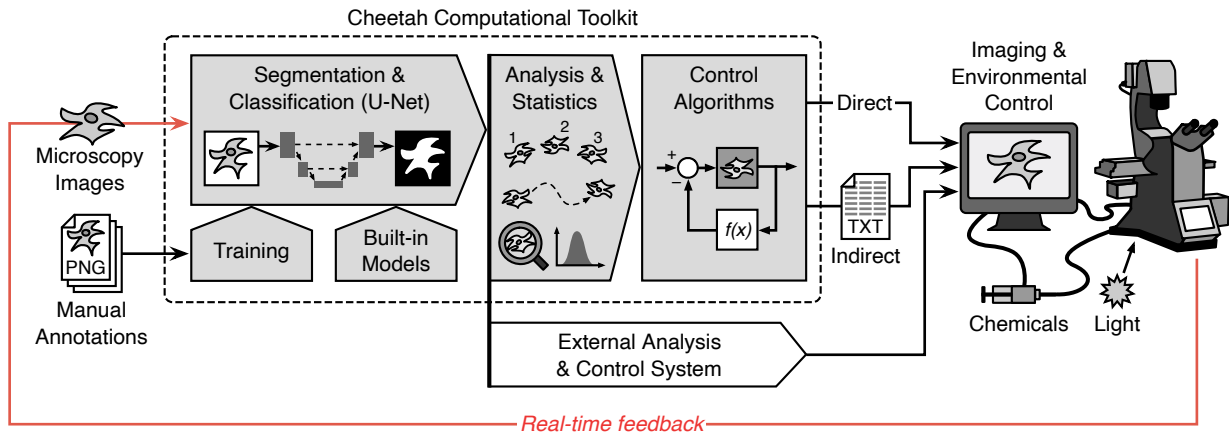

518

519 **Figure 1: Overview of the Cheetah computational toolkit.** Structure of Cheetah's core  
520 modules and their interactions (grey filled arrows and boxes). The modular nature of the toolkit  
521 allows elements to be used separately, e.g., enabling the use of the built-in segmentation  
522 functionality with external analysis and control systems (white pointed box). Control algorithms  
523 can either directly interface with the imaging and environmental control system or output their  
524 data to text files for use by the external system (i.e. an indirect interface).

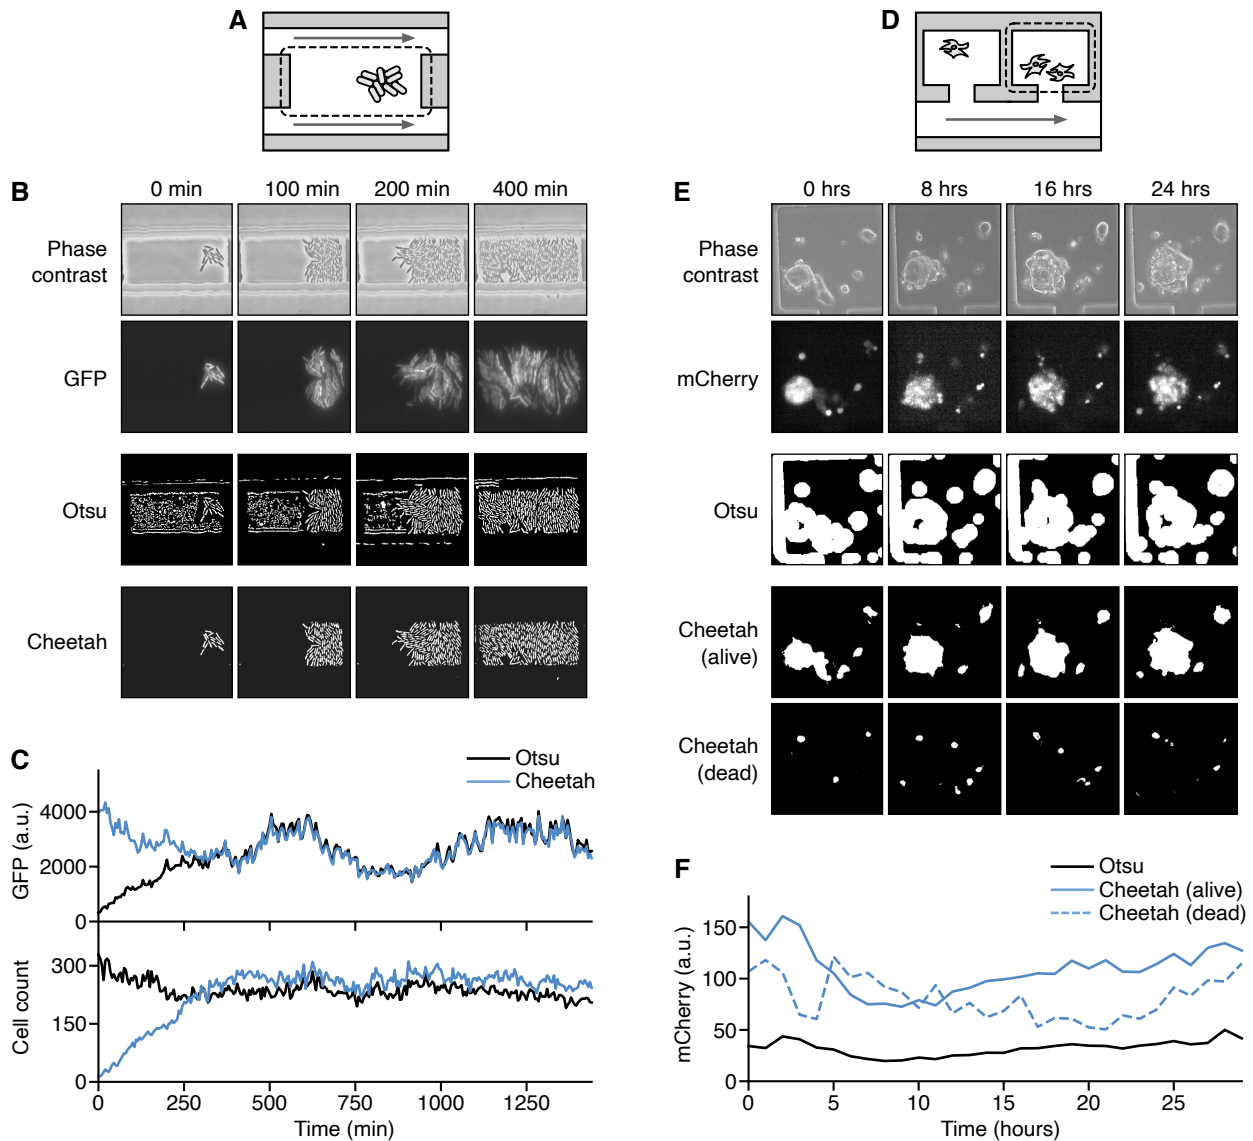

525

526 **Figure 2: Monitoring and analysis of bacteria and mammalian cells in microfluidic chips.**

527 (A) Schematic of the microfluidic chamber used for bacterial growth and imaging. A typical  
 528 imaging area is shown by the dashed box and flow of nutrients is shown by the grey arrows. (B)  
 529 Time-lapse images of *Escherichia coli* cells growing in the microfluidic chamber for phase  
 530 contrast and GFP fluorescence, as well as segmentation masks for cells generated using the  
 531 Otsu method and Cheetah (white regions denote cells). (C) Average GFP fluorescence of the  
 532 cell segmentation mask and cell count over time calculated using either the Otsu or Cheetah  
 533 segmentation masks. (D) Schematic of the microfluidic chamber used for mouse embryonic stem  
 534 cells (mESCs) growth and imaging. A typical imaging area is shown by the dashed box and flow  
 535 of nutrients is shown by the grey arrows. (E) Time-lapse images of mESCs growing in the  
 536 microfluidic chamber for phase contrast and mCherry fluorescence, as well as segmentation  
 537 masks for cells generated using the Otsu method and Cheetah (white regions denote cells). For  
 538 Cheetah, separate masks are shown for living and dead cells. (F) Average mCherry fluorescence  
 539 of the cell segmentation mask over time calculated using either the Otsu method or Cheetah.

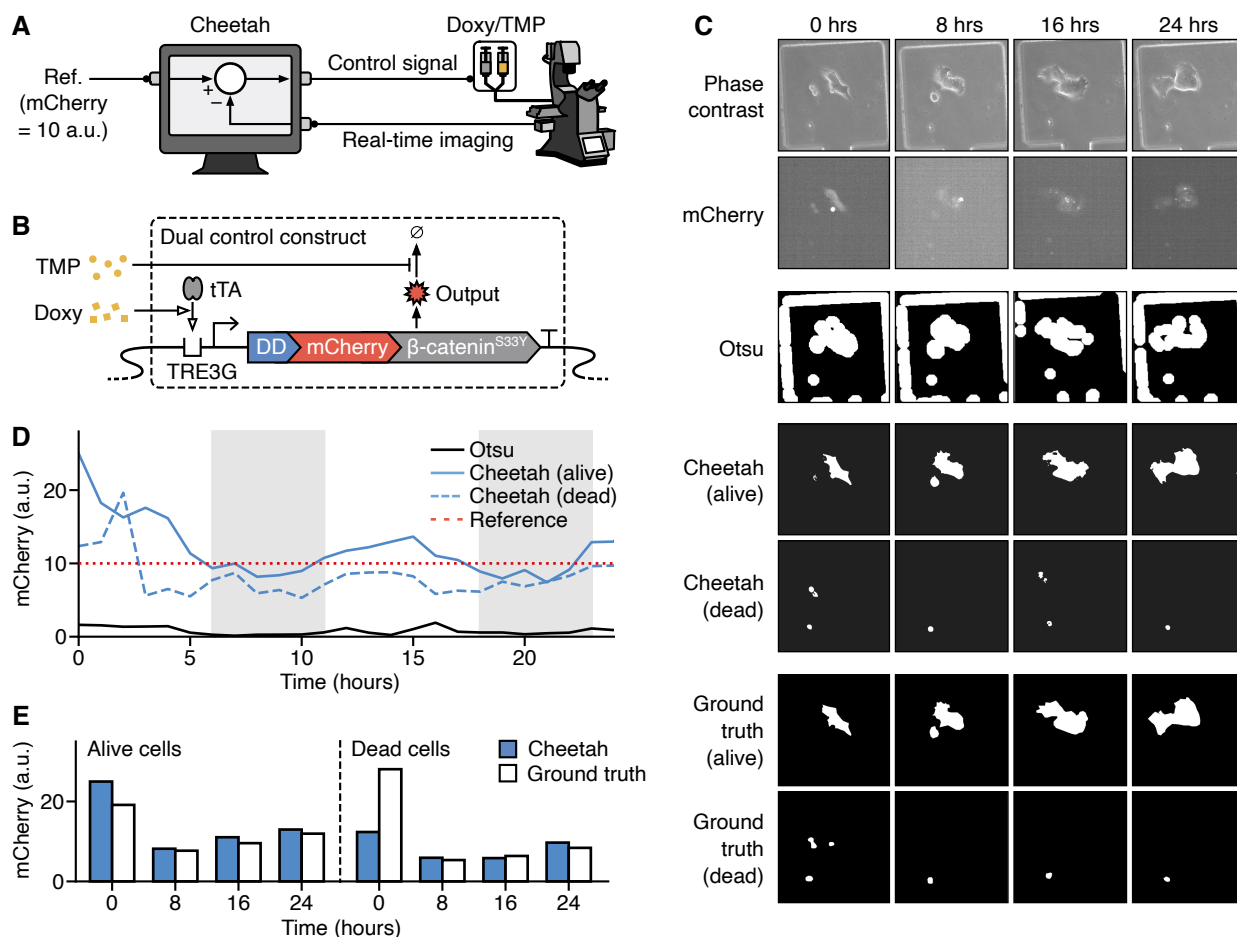

540

541 **Figure 3: Closed-loop control of protein expression in mammalian cells.** (A) Schematic of  
 542 the microfluidic system used for external closed-loop control. A desired reference cellular  
 543 mCherry fluorescence of 10 arbitrary units (a.u.) is shown. (B) Overview of genetic construct  
 544 used to control mCherry expression<sup>26</sup>. Small molecules (TMP and Doxy) work in tandem to boost  
 545 the expression level of mCherry. Regulation is due to a tetracycline transcriptional activator (tTA)  
 546 and a destabilising domain (DD) which forms part of the mCherry reporter protein. (C) Time-lapse  
 547 images of mouse embryonic stem cells (mESCs) growing in the system for phase contrast and  
 548 mCherry fluorescence, as well as segmentation masks for cells generated using the Otsu  
 549 method, Cheetah and manually annotated to give a ground truth (white regions denote cells).  
 550 For Cheetah and the ground truth, separate masks are shown for living and dead cells. (D)  
 551 Average mCherry fluorescence of the cell segmentation mask over time calculated using either  
 552 the Otsu method or Cheetah. Red dotted line denotes the external reference that the controller  
 553 aims to maintain (10 a.u.). Grey shaded regions show when the control signal triggered release  
 554 of TMP and Doxy. Control signals were generated by using average mCherry fluorescence  
 555 calculated using segmentation masks of alive cells from Cheetah. (E) Comparison of average  
 556 mCherry fluorescence at specific time points during the experiment for segmentation masks  
 557 generated by Cheetah and manually annotated (ground truth).

558

559 **Supplementary Movie Captions**

560 **Supplementary Movie 1: Open-loop experiment of bacterial cells.** Otsu- and Cheetah-based  
561 segmentation results are shown, comparing the computed masks, cell number and GFP  
562 fluorescence over time.

563  
564 **Supplementary Movie 2: Open-loop experiment of mouse embryonic stem cells.** Otsu- and  
565 Cheetah-based segmentation results are shown, comparing the computed masks and mCherry  
566 fluorescence. Cheetah also classify cells as live and dead and provides fluorescent protein  
567 dynamics of each.

568  
569 **Supplementary Movie 3: External feedback control experiment of mouse embryonic stem  
570 cells performed using Cheetah-based segmentation.** Offline Otsu- and online Cheetah-based  
571 segmentation results are shown, comparing the computed masks cell number and mCherry  
572 fluorescence. The control input provided during the experiment and the set-point control  
573 reference are also shown.

574  
575 **Supplementary Movie 4: Detailed analysis dashboard for bacteria growing in a  
576 microfluidic chip.** Top two panels on the left show the phase contrast and GFP fluorescence  
577 images from the microscope. Top right panel shows detailed analysis of the phase contrast image  
578 with cells labelled by colour and a light grey bounding box and their centre of mass and major  
579 axis (i.e. orientation) denoted by a red circle and line, respectively. The bottom two panels show  
580 the time course of both cell count and single-cell GFP fluorescence (with the average shown as  
581 a solid line and  $\pm$  the standard deviation depicted by the shaded area).
